# Supplementary material for: Current Perspectives on Interferon Beta-1b for the Treatment of Multiple Sclerosis
Source: PubMed Central journal article supplement — Adv Ther. 2014 Sep 3;31(9):915–31. doi: 10.1007/s12325-014-0149-1 (PMC4177103; doi:10.1007/s12325-014-0149-1), 2014-09-03
Supplement: 12325_2014_149_MOESM1_ESM.pdf [file 12325_2014_149_MOESM1_ESM.pdf]

- Approved in 1993, subcutaneous interferon (IFN) beta-1b was the first disease-modifying therapy (DMT) indicated for relapsing-remitting multiple sclerosis (RRMS).
- There are now seven DMTs approved for first-line treatment of RRMS, including four injectable, two oral and one intravenous therapy.
- The results from clinical trials of IFN beta-1b, and from extension or follow-up studies undertaken, are reviewed from the perspectives of efficacy, safety and tolerability.
- The challenges associated with self-administration of IFN beta, and developments in autoinjector design that have helped to address these challenges, are also reviewed.
- The well-established efficacy, safety and tolerability profiles continue to support the long-term use of IFN beta-1b in relapsing MS.

This summary slide represents the opinions of the authors. Publication fees were paid by Novartis Pharma AG. The authors would like to acknowledge Jeremy Bright from Oxford PharmaGenesis™ Ltd, who provided editorial support with funding from Novartis Pharma AG. For a full list of acknowledgments and conflicts of interest for all authors of this article, please see the full text online. Copyright © The Author(s) 2014. Creative Commons Attribution Noncommercial License (CC BY-NC).
